# Supplementary material for: Parkinson’s Disease-Associated Mutant LRRK2-Mediated Inhibition of miRNA Activity is Antagonized by TRIM32
Source: PubMed Central journal article supplement (PMC5842508; doi:10.1007/s12035-017-0570-y), 2017-05-15

**A**

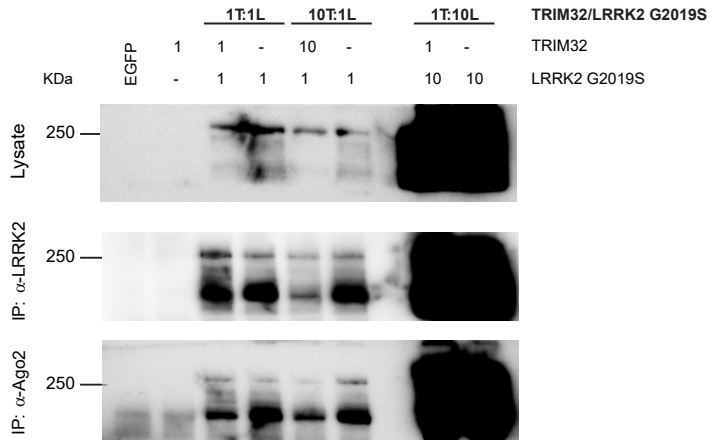

**B**

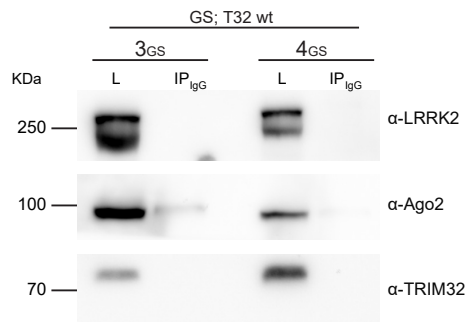

Supplement: 12035_2017_570_MOESM3_ESM.pdf [file 12035_2017_570_MOESM3_ESM.pdf]
